# Supplementary material
Source: HighWire-hosted journal article supplement (https://www.cmajopen.ca/highwire/filestream/90834/field_highwire_adjunct_files/0/open-2023-0046-original-submission.pdf)
Supplement: open-2023-0046-original-submission.pdf [file open-2023-0046-original-submission.pdf]

1  
2  
3  
4  
5  
6  
7 Neighbourhood Deprivation, Distance to the Nearest Comprehensive Stroke Centre, and Access  
8 to Endovascular Thrombectomy for Ischemic Stroke: a Population Based Study  
9  
10

11  
12  
13  
14 Matthew E. Eagles MD MSc,<sup>1,2</sup> Reed F. Beall PhD,<sup>2</sup> David Ben-Israel MD MSc,<sup>1,2</sup> John H. Wong  
15 MD MSc MBA,<sup>1</sup> Michael D. Hill,<sup>1,2</sup> Eldon Spackman,<sup>2</sup>  
16  
17  
18  
19  
20

21 Affiliations:

22  
23 <sup>1</sup> Department of Clinical Neurosciences, Hotchkiss Brain Institute, Cumming School of Medicine,  
24 University of Calgary, Calgary, AB, Canada.  
25

26  
27 <sup>2</sup> Department of Community Health Sciences, Cummings School of Medicine and O'Brien  
28 Institute for Public Health, University of Calgary, Calgary, Alberta, Canada.  
29  
30

31  
32  
33  
34 Corresponding Author's name and current institution:

35  
36 Matthew E. Eagles,

37  
38 Department of Neurosurgery, University of Calgary

39  
40 Corresponding Author's Email: [matthew.eagles@ucalgary.ca](mailto:matthew.eagles@ucalgary.ca)  
41  
42  
43  
44

45 The primary author of this work (MEE) received funding through the Canadian Institute of  
46 Health Research Canada Graduate Scholarship – Master's Program.  
47  
48  
49  
50

51  
52 The authors do not have any conflict of interest to declare related to this work.  
53  
54  
55  
56  
57  
58  
59  
60

### Background:

Endovascular thrombectomy (EVT) has revolutionized ischemic stroke care. However, it is available primarily at comprehensive stroke centres (CSCs). Individuals from deprived neighbourhoods or rural locations may have less access to EVT. This work investigated whether individuals living in more deprived neighbourhoods are less likely to be treated with EVT and whether this relationship is mediated by the distance an individual lives from the nearest CSC.

### Methods:

We performed a retrospective study including all individuals from Alberta, Canada who were treated with Alteplase for an ischemic stroke between January 1, 2017, and December 31, 2019. The primary outcome was treatment with EVT. Neighbourhood deprivation was assigned based on the Pampalon Index. Distances to the nearest CSC were calculated based on participant postal codes. We used logistic regression modeling to assess for a relationship between our dependent and independent variables. We performed a mediation analysis to calculate the Average Causal Mediation Effect (ACME) of distance to the nearest CSC on the relationship of interest.

### Results:

Patients from the most deprived neighbourhoods were less likely to be treated with EVT in the primary model (OR 0.43, 95% CI: 0.24 – 0.77). Neighbourhood deprivation was not significantly associated with EVT when distance to the nearest CSC was included as a covariate. The calculated ACME was -0.059 (95% CI: - 0.082 - -0.030) indicating statistically significant mediation by distance to the nearest CSC.

### Conclusions:

These results suggest that individuals from more deprived neighbourhoods are less likely to be treated with EVT and that improving access to individuals from rural locations may improve the equitable distribution of EVT.

## Introduction

Acute ischemic stroke is the most common form of cerebrovascular disease and typically results from the sudden occlusion of a cerebral artery.<sup>1</sup> This leads to tissue ischemia and subsequent neural injury, which progresses to irreversible cell death rapidly with time.<sup>1</sup> Unfortunately, ischemic stroke remains a leading cause of morbidity and mortality worldwide.<sup>2</sup> Early treatment goals are centered around reperfusion of the ischemic brain, which was traditionally accomplished by administration of intravenous thrombolytic medications within 4.5 hours of stroke onset.<sup>3</sup> More recently, endovascular thrombectomy (EVT) for ischemic stroke has revolutionized the treatment of this condition.<sup>4-10</sup>

Multiple randomized controlled trials were published in 2015 and demonstrated that EVT, in addition to intravenous (IV) thrombolysis, was superior to IV thrombolysis alone in preventing death and disability after ischemic stroke.<sup>4-10</sup> Because the injury from tissue ischemia progresses to irreversible cell death quickly, EVT is best performed within 6 hours of stroke onset as it reperfuses the ischemic brain and prevents further progression of the cell death.<sup>11,12</sup>

EVT for ischemic stroke is resource intensive and is only available at comprehensive stroke centres (CSCs). Several studies using the American National Inpatient Sample (NIS) database have found an association between geographic markers of socioeconomic status (SES) and the odds of being treated with EVT.<sup>13-16</sup> However, this question has not been assessed in the context of Canada's healthcare system. Unlike the United States, Canada has a publicly funded, universal healthcare system. The Canada Health Act (1984) stipulates that every Canadian

1  
2  
3 province must provide comprehensive, universal, and accessible hospital services to all  
4  
5 residents.<sup>17</sup> Individuals who would have a financial barrier to care in a private insurance system,  
6  
7 theoretically, have no such barrier in Canada.  
8  
9

10  
11  
12 Measuring patient SES in retrospective studies poses challenges. In Canada, the most widely  
13  
14 used measure of neighborhood SES was developed by Pampalon and colleagues.<sup>18,19</sup> They  
15  
16 created an area-based metric for assessing material and social deprivation. Scores were based  
17  
18 on the smallest geographical unit collected on the Canadian census: the dissemination area  
19  
20 (DA).<sup>20</sup> While this Material and Social Deprivation Index (MSDI) was initially created for the  
21  
22 province of Quebec alone, it has since expanded to cover the whole of Canada and has  
23  
24 previously demonstrated an association with mortality after stroke.<sup>21,22</sup>  
25  
26  
27  
28  
29  
30  
31

32 We assessed whether an individual's neighborhood SES (as estimated by their Pampalon index)  
33  
34 is predictive of their access to EVT after receiving Alteplase when suffering an ischemic stroke  
35  
36 among patients living in Alberta, Canada. A secondary aim was to assess whether any  
37  
38 discrepancy in the odds of receiving EVT is mediated by the distance an individual lives from the  
39  
40 nearest CSC. We hypothesize that individuals from low SES areas of Alberta will be less likely to  
41  
42 receive EVT after Alteplase for ischemic stroke. However, we anticipate that this relationship is,  
43  
44 at least partially, explained by the association between low SES neighborhoods and the distance  
45  
46 they are situated from CSCs.  
47  
48  
49  
50  
51  
52  
53

## 54 **Methods**

55  
56  
57  
58  
59  
60

## Data and Population

We performed a retrospective analysis of the “Quality Improvement and Clinical Research” (QuICR) database. This is a prospective dataset including all patients treated with intravenous thrombolysis and/or endovascular thrombectomy for ischemic stroke in Alberta and is maintained by the Cardiovascular and Stroke Strategic Clinical Network at Alberta Health Services.<sup>23</sup> We included all individuals greater than 18 years of age, living in Alberta, who were hospitalized with an ischemic stroke and treated with IV alteplase between January 1, 2017 and December 31, 2019. Clinical and demographic characteristics of our patient population were extracted from the QuICR and the Alberta Health Services “Data Integration, Measurement, and Reporting” (DIMR) administrative databases.<sup>24</sup>

## Independent Variable of Interest

### *Material and Social Deprivation*

We linked patient home address postal codes to the federal census dissemination areas (DAs) within the province of Alberta.<sup>25</sup> We assigned a material and social deprivation score to each DA using data provided by the Institut National de Santé de Québec.<sup>26</sup> These metrics have been previously validated for use across Canada.<sup>27</sup> Scores were grouped into quintiles for both material and social deprivation, from least deprived (most privileged) to most deprived. These were combined to create an overall measure of deprivation for use in the statistical analysis. The two quintiles were combined based on the suggested method by Garnache *et al.* (Figure 1).<sup>26</sup>

## Outcome of Interest:

1  
2  
3 The primary outcome of this study was treatment with EVT after receiving IV Alteplase for an  
4 individual's ischemic stroke. All individuals who had an EVT attempted were deemed to have  
5  
6 been treated with EVT, regardless of whether the vessel was opened successfully with the  
7  
8 intervention.  
9  
10  
11  
12  
13

14  
15 The secondary outcome of this work was the Average Causal Mediation Effect (ACME) between  
16  
17 treatment with EVT and the distance from an individual's postal code (in kilometers) to the  
18  
19 nearest CSC. This metric provides an estimate of what portion of the discrepancy in odds of  
20  
21 being treated with EVT based on neighborhood SES is attributable to the distance from the  
22  
23 neighborhood to the nearest CSC. We performed our mediation analysis according to the steps  
24  
25 outlined by Baron and Kenny (1986).<sup>28</sup>  
26  
27  
28  
29  
30  
31

### 32 *Distance to the Nearest CSC*

33  
34 We examined the home address postal codes for all patients in the dataset to ensure they were  
35  
36 residents of Alberta, Canada. We calculated distances, in kilometers, from the centre of each  
37  
38 postal code to the nearest CSC in Alberta (University of Alberta Hospital in Edmonton and  
39  
40 Foothills Medical Centre in Calgary) using ArcGIS Pro for geocoding and the NAD 83 UTM 11  
41  
42 map projection (Esri, Redlands, Ca, USA). We examined the relationship between distance to  
43  
44 the nearest CSC and neighborhood deprivation using a multinomial logistic regression model.  
45  
46  
47  
48  
49  
50  
51

### 52 Statistical Analysis

1  
2  
3 We used descriptive statistics to examine the baseline characteristic of the study cohort.  
4  
5  
6 Continuous variables that followed a normal distribution were assessed for an association with  
7  
8 the outcome of interest using Student's t-test and categorical variables were assessed using  
9  
10 Pearson's Chi-Squared test. Continuous variables that showed significant deviations from  
11  
12 normality were assessed using non-parametric tests, as appropriate. To assess the relationship  
13  
14 between our independent variables of interest and our primary outcome, we fit three multiple  
15  
16 logistic regression models. All covariates for the model were selected *a priori* based on clinical  
17  
18 relevance. In the first model, we included age, sex, and pre-Alteplase National Institute of  
19  
20 Health Stroke Scale (NIHSS) score as covariates. The NIHSS score is a numerical marker of stroke  
21  
22 severity, with higher numbers being indicative of a more severe stroke.<sup>29</sup> In a secondary model,  
23  
24 we included distance to the nearest CSC as a covariate. We also included age and distance as  
25  
26 potential effect modifiers using interaction terms and tested for significant effect modification  
27  
28 using the Wald test. Lastly, we performed a formal mediation analysis using the mediate  
29  
30 function from the *mediation* R package.<sup>30</sup> We calculated the ACME using the primary and  
31  
32 secondary logistic regression models and specified distance to the nearest CSC as the mediating  
33  
34 variable. We used a bootstrapping method with 500 simulations. We performed all modeling  
35  
36 using a complete case analysis.  
37  
38  
39  
40  
41  
42  
43  
44  
45  
46

47 Statistical significance was set at  $p = 0.05$ . All statistical analysis was performed using R Studio  
48  
49 (R Studio. Boston, MA, USA).  
50  
51  
52  
53

## 54 **Results**

55  
56  
57  
58  
59  
60

1  
2  
3 There were 1400 individuals who suffered an ischemic stroke and were treated with  
4  
5 intravenous alteplase in Alberta between January 1, 2017, and December 31, 2019. Of these, 65  
6  
7 were residents of other provinces or countries, and were excluded from the analysis, leaving  
8  
9 1335 patients in the study. Of the 1335 patients included, 314 (23.5%) had an EVT attempted,  
10  
11 and 181 (13.6%) had missing data, excluding them from the analysis. Other characteristics of  
12  
13 the study cohort can be seen in Table 1.  
14  
15  
16  
17  
18  
19

#### 20 Distance to the Nearest CSC and Deprivation

21  
22 We observed a statistically significant relationship between deprivation level and distance to  
23  
24 the nearest CSC using a Kruskal-Wallis test ( $p = 0.002$ ). In the multinomial logistic regression  
25  
26 model, we observed a statistically significant difference in the odds of being in the most  
27  
28 deprived neighborhood, as compared to the least deprived neighborhood, based on the  
29  
30 distance an individual lives from the nearest CSC (OR 1.006, 95% CI: 1.004 – 1.009) (Figure 2).  
31  
32  
33  
34  
35  
36

#### 37 Association between EVT and level of deprivation

38  
39 We observed a statistically significant relationship between an individual's geographic  
40  
41 deprivation level and treatment with EVT after Alteplase for ischemic stroke using a Kruskal-  
42  
43 Wallis test ( $p = 0.04$ ) (Figure 3). Bivariate logistic regression also demonstrated a statistically  
44  
45 significant relationship between being in the most deprived deprivation level (i.e., level 5) and  
46  
47 being treated with EVT after Alteplase for ischemic stroke (Table 2). The unadjusted odd ratio  
48  
49 compared to the least deprived group of patients was 0.53 (95% CI 0.32 – 0.87).  
50  
51  
52  
53  
54  
55  
56  
57  
58  
59  
60



1  
2  
3 We did not observe any evidence of significant effect modification using the Wald test ( $p >$   
4  
5 0.05). As such, the regression models did not contain any interaction terms. In the primary  
6  
7 logistic regression model individuals from the lowest SES neighborhoods were significantly less  
8  
9 likely to be treated with EVT than individuals from the highest SES neighborhoods (OR 0.431,  
10  
11 95% CI: 0.240 – 0.769)) (Table 3). The predicted proportion of patients who would receive EVT  
12  
13 decreased with increasing distance to a CSC, regardless of neighborhood deprivation level  
14  
15 (Figure 4). In the secondary model, neighborhood SES was not significantly associated with the  
16  
17 odds of receiving EVT, though there was a significant inverse relationship between the distance  
18  
19 an individual lives from a CSC and the odds of receiving EVT (Table 4).  
20  
21  
22  
23  
24  
25  
26  
27

### 28 Mediation Analysis

29  
30 The mean ACME of distance to the nearest CSC across all deprivation levels was -0.059 (95% CI:  
31  
32 - 0.082 - -0.030), which suggests statistically significant mediation by the distance an individual  
33  
34 lives to the nearest CSC on the relationship between neighborhood deprivation and treatment  
35  
36 with EVT.  
37  
38  
39  
40  
41

### 42 **Interpretation**

43  
44 The results of our unadjusted analysis imply that individuals who live in the most deprived areas  
45  
46 of Alberta may be less likely to be treated with EVT after Alteplase for an ischemic stroke.  
47  
48 However, the distance an individual lives from the nearest CSC accounts for much of this  
49  
50 discrepancy, as demonstrated by our secondary model and mediation analysis. These findings  
51  
52 suggest that the healthcare providers are not systematically excluding individuals from low SES  
53  
54  
55  
56  
57  
58  
59  
60

1  
2  
3 neighborhoods from this novel treatment, which is encouraging. Nonetheless, disparities may  
4  
5 persist. Low SES neighborhoods tend to be further away from CSCs than high SES areas. As  
6  
7 such, individuals from the poorest parts of Alberta may take longer to get to an EVT capable  
8  
9 centre, thereby decreasing the odds they will be treated with EVT when suffering an ischemic  
10  
11 stroke. Ultimately, these findings highlight the challenges of ensuring equitable distribution of  
12  
13 time sensitive interventions to geographically isolated populations.  
14  
15  
16  
17  
18  
19

### 20 SES and Access to EVT

21  
22 Prior to the advent of EVT, the best way of reperusing ischemic brain during a stroke was IV  
23  
24 thrombolysis with Alteplase.<sup>3,31</sup> This remained standard of care until the publication of several  
25  
26 clinical trials in 2015 that showed EVT in addition to Alteplase was superior to Alteplase alone  
27  
28 for treatment of ischemic stroke due to a large vessel occlusion in the anterior circulation.<sup>4-8</sup>  
29  
30 Unfortunately, there are limited data on whether the benefits from this treatment advance has  
31  
32 been equitably distributed along socioeconomic lines. Two American papers published in 2014  
33  
34 used data from the NIS database to assess the relationship between SES and EVT.<sup>13,14</sup> One  
35  
36 looked at the years 2006-2010 and the other looked at only 2008. Both papers observed a  
37  
38 statistically significant difference in the odds of being treated with EVT for patients living in  
39  
40 areas with the lowest median income; however, both papers used data collected before EVT  
41  
42 was considered standard of care. More recently, authors have again turned to the NIS database  
43  
44 to address the relationship between SES and EVT with two more papers being published on the  
45  
46 topic in 2021,<sup>15,16</sup> again finding that low SES individuals were less likely to be treated with EVT.  
47  
48 Both papers used American data and did not restrict their cohorts to individuals who received  
49  
50  
51  
52  
53  
54  
55  
56  
57  
58  
59  
60

1  
2  
3 Alteplase for their ischemic stroke. While the paper by de Havenon and colleagues (2021)  
4  
5 controlled for whether patients lived in an urban or rural area, neither study controlled for the  
6  
7 distance an individual lives to the nearest CSC. To our knowledge, no study has investigated this  
8  
9 question in Canada, which has a universal, publicly funded healthcare system, unlike the United  
10  
11 States. This work included only individuals who were treated with Alteplase, which was the  
12  
13 previous standard of care. Nonetheless, these results are notable for suggesting that disparities  
14  
15 in access to acute stroke intervention between the most and least deprived individuals in  
16  
17 Alberta is largely explained by the reality that deprived individuals tend to live further from  
18  
19 CSCs than their more privileged peers.  
20  
21  
22  
23  
24  
25  
26  
27

#### 28 Distance to a CSC, Neighborhood SES, and Access to EVT

29  
30 The results of our mediation analysis suggest that the discrepancy in access to EVT based on  
31  
32 neighborhood SES is mediated by the distance an individual lives to the nearest CSC. Although  
33  
34 provinces in Canada are responsible for providing universal and accessible healthcare to all  
35  
36 residents, the reality is more complicated. A recent review of Canada's health system argued  
37  
38 that despite our universal healthcare, those living in rural and remote communities have less  
39  
40 access to physical and human healthcare resources.<sup>32</sup> This is of particular relevance for time-  
41  
42 sensitive interventions, such as EVT for ischemic stroke. Again, studies out of the United States  
43  
44 suggest that individuals who live in rural areas are less likely to be brought to an EVT capable  
45  
46 centre when suffering an ischemic stroke, and this significantly decreases the odds that they  
47  
48 will receive treatment with EVT regardless of the facility's transfer capability.<sup>33</sup> That individuals  
49  
50 who live far from CSCs are also less likely to receive EVT in Canada is unsurprising, as it is a time  
51  
52  
53  
54  
55  
56  
57  
58  
59  
60

1  
2  
3 sensitive intervention.<sup>11,12</sup> Our results showed that individuals from the most deprived  
4  
5 neighborhoods were significantly more likely to live further from CSCs than their peers from  
6  
7 high SES areas. As such, it is likely that the relationship between access to EVT and living in low  
8  
9 SES areas is mediated by the distance these individuals live from centres capable of performing  
10  
11 this procedure. This problem is not easy to reconcile for Canadian policymakers, who are tasked  
12  
13 with providing quality healthcare to a geographically dispersed population. However, it does  
14  
15 suggest that improving access to EVT for individuals in more remote locations will have an  
16  
17 additional benefit of ensuring more equitable access to this therapy for those living in low SES  
18  
19 areas. Thankfully, recent trials have sought to expand the treatment window for EVT based on  
20  
21 certain imaging characteristics,<sup>9,10</sup> which may improve equity in access to this revolutionary  
22  
23 treatment.  
24  
25  
26  
27  
28  
29  
30  
31

### 32 Limitations and Future Directions

34  
35 We acknowledge there are some limitations of this investigation. First, our cohort was  
36  
37 restricted to individuals who received Alteplase as treatment for their ischemic stroke, which  
38  
39 excludes any individual who presented outside the window for thrombolysis. This may  
40  
41 systematically exclude low SES individuals if they are more likely to present to medical attention  
42  
43 outside the treatment window for Alteplase. However, this did allow us to compare for whether  
44  
45 any pre-existing disparities in access to acute stroke care were widened by the advent of EVT.  
46  
47 Second, our independent variable of interest was neighborhood level SES, which may not be  
48  
49 reflective of an individual's SES. Although neighborhood SES is associated with health  
50  
51 outcomes, it does raise the possibility of the ecological fallacy.<sup>34,35</sup> Nonetheless, we felt that  
52  
53  
54  
55  
56  
57  
58  
59  
60

1  
2  
3 neighborhood SES was an appropriate independent variable given the limitations of  
4  
5 administrative data. Lastly, our dataset did not contain a race variable, which may play a  
6  
7 confounding role in the relationship between neighborhood SES and treatment decisions.  
8  
9  
10 However, previous works using the Pampalon index have found it to be predictive of adverse  
11  
12 health outcomes even after accounting for race.<sup>36</sup> Future works should attempt to replicate  
13  
14 these findings but not limit the study cohort to individuals treated with Alteplase. Furthermore,  
15  
16 researchers should investigate whether individuals from low SES areas suffer worse outcomes  
17  
18 and have longer times to treatment than their high SES peers. Lastly, these results do not assess  
19  
20 the cost effectiveness of changes that might result in a more equitable distribution of EVT  
21  
22 based on neighborhood level deprivation and the distance individuals live from a CSC. As such,  
23  
24 future researchers may wish to perform a distributional cost-effectiveness analysis that  
25  
26 accounts for improved equity and the finite resources of Alberta's health care system.  
27  
28  
29  
30  
31  
32  
33  
34

### 35 Conclusions

36  
37 Our main analysis found a significant difference in the odds of receiving EVT after IV Alteplase  
38  
39 for an ischemic stroke based on neighborhood SES. Further analysis showed that individuals in  
40  
41 the lowest SES neighborhoods tend to live further from CSCs than individuals from high SES  
42  
43 neighborhoods. Our results suggest that a key avenue for improving the equitable distribution  
44  
45 of EVT is to improve access for individuals who live outside large urban centres.  
46  
47  
48  
49

### 50 **Funding**

51  
52 The primary author of this work (MEE) received funding through the Canadian Institute of  
53  
54 Health Research Canada Graduate Scholarship – Master's Program.  
55  
56  
57  
58  
59  
60

1  
2  
3 **Acknowledgements**  
4

5 The authors would like to extend a sincere thanks to Paul R. Pival and Renna Truong at the  
6  
7 University of Calgary Research libraries for their assistance in cleaning and organizing the  
8  
9 geographic data.  
10  
11  
12  
13  
14  
15  
16  
17  
18  
19  
20  
21  
22  
23  
24  
25  
26  
27  
28  
29  
30  
31  
32  
33  
34  
35  
36  
37  
38  
39  
40  
41  
42  
43  
44  
45  
46  
47  
48  
49  
50  
51  
52  
53  
54  
55  
56  
57  
58  
59  
60

Confidential

## References:

1. van der Worp HB, van Gijn J. Clinical practice. Acute ischemic stroke. *N. Engl. J. Med.* 2007;357:572-9.
2. Lopez AD, Mathers CD, Ezzati M, Jamison DT, Murray CJ. Global and regional burden of disease and risk factors, 2001: systematic analysis of population health data. *Lancet.* 2006;367:1747-57.
3. Emberson J, Lees KR, Lyden P, et al. Effect of treatment delay, age, and stroke severity on the effects of intravenous thrombolysis with alteplase for acute ischaemic stroke: a meta-analysis of individual patient data from randomised trials. *Lancet.* 2014;384:1929-35.
4. Berkhemer OA, Fransen PS, Beumer D, et al. A randomized trial of intraarterial treatment for acute ischemic stroke. *N. Engl. J. Med.* 2015;372:11-20.
5. Campbell BC, Mitchell PJ, Kleinig TJ, et al. Endovascular therapy for ischemic stroke with perfusion-imaging selection. *N. Engl. J. Med.* 2015;372:1009-18.
6. Goyal M, Demchuk AM, Menon BK, et al. Randomized assessment of rapid endovascular treatment of ischemic stroke. *N. Engl. J. Med.* 2015;372:1019-30.
7. Jovin TG, Chamorro A, Cobo E, et al. Thrombectomy within 8 hours after symptom onset in ischemic stroke. *N. Engl. J. Med.* 2015;372:2296-306.
8. Saver JL, Goyal M, Bonafe A, et al. Stent-retriever thrombectomy after intravenous t-PA vs. t-PA alone in stroke. *N. Engl. J. Med.* 2015;372:2285-95.
9. Albers GW, Marks MP, Kemp S, et al. Thrombectomy for Stroke at 6 to 16 Hours with Selection by Perfusion Imaging. *N. Engl. J. Med.* 2018;378:708-18.
10. Nogueira RG, Jadhav AP, Haussen DC, et al. Thrombectomy 6 to 24 Hours after Stroke with a Mismatch between Deficit and Infarct. *N. Engl. J. Med.* 2018;378:11-21.
11. Powers WJ, Rabinstein AA, Ackerson T, et al. Guidelines for the Early Management of Patients With Acute Ischemic Stroke: 2019 Update to the 2018 Guidelines for the Early Management of Acute Ischemic Stroke: A Guideline for Healthcare Professionals From the American Heart Association/American Stroke Association. *Stroke.* 2019;50:e344-e418.
12. Boulanger JM, Lindsay MP, Gubitz G, et al. Canadian Stroke Best Practice Recommendations for Acute Stroke Management: Prehospital, Emergency Department, and Acute Inpatient Stroke Care, 6th Edition, Update 2018. *Int. J. Stroke.* 2018;13:949-84.
13. Brinjikji W, Rabinstein AA, Cloft HJ. Socioeconomic disparities in the utilization of mechanical thrombectomy for acute ischemic stroke. *J. Stroke Cerebrovasc. Dis.* 2014;23:979-84.
14. Attenello FJ, Adamczyk P, Wen G, et al. Racial and socioeconomic disparities in access to mechanical revascularization procedures for acute ischemic stroke. *J. Stroke Cerebrovasc. Dis.* 2014;23:327-34.
15. de Havenon A, Sheth K, Johnston KC, et al. Acute Ischemic Stroke Interventions in the United States and Racial, Socioeconomic, and Geographic Disparities. *Neurology.* 2021;97:e2292-e303.

16. Mehta AM, Fifi JT, Shoirah H, et al. Racial and Socioeconomic Disparities in the Use and Outcomes of Endovascular Thrombectomy for Acute Ischemic Stroke. *AJNR Am. J. Neuroradiol.* 2021;42:1576-83.
17. Canada Health Act: Government of Canada; 1984.
18. Poirier MJ, Wilson MG. Identifying how area-based socio-economic Indicators are measured in Canada. *Identifying how area-based socio-economic Indicators are measured in Canada*2019:32-.
19. Pampalon R, Raymond G. A deprivation index for health and welfare planning in Quebec. *Chronic Dis. Can.* 2000;21:104-13.
20. Dictionary, Census of Population, 2016: Dissemination area (DA). 2016; <https://www12.statcan.gc.ca/census-recensement/2016/ref/dict/geo021-eng.cfm>. Accessed April 27, 2022.
21. Pampalon R, Hamel D, Gamache P, Philibert MD, Raymond G, Simpson A. An area-based material and social deprivation index for public health in Québec and Canada. *Can. J. Public Health.* 2012;103:S17-22.
22. Martinez J, Pampalon R, Hamel D. Deprivation and stroke mortality in Quebec. *Chronic Dis. Can.* 2003;24:57-64.
23. Quality Improvement & Clinical Research: Alberta Stroke Program. 2022; <https://cumming.ucalgary.ca/research/quicr/home>. Accessed 2022/03/07.
24. Data and Analytics: Alberta Health Services. 2022; <https://www.albertahealthservices.ca/findhealth/service.aspx?Id=1661&facilityId=1005258>. Accessed 2022/03/07.
25. Postal Code Conversion File (PCCF), Reference Guide. May 4, 2022; <https://www150.statcan.gc.ca/n1/en/catalogue/92-154-X>
26. Gamache PH, D.; Blaser, C. Material and social deprivation index: A summary. 2019; [www.inspq.qc.ca/en/publications/2639](http://www.inspq.qc.ca/en/publications/2639).
27. Pampalon R, Hamel D, Gamache P, Raymond G. A deprivation index for health planning in Canada. *Chronic Dis. Can.* 2009;29:178-91.
28. Baron RM, Kenny DA. The moderator–mediator variable distinction in social psychological research: Conceptual, strategic, and statistical considerations. *J. Pers. Soc. Psychol.* 1986;51:1173.
29. Brott T, Adams HP, Olinger CP, et al. Measurements of acute cerebral infarction: a clinical examination scale. *Stroke.* 1989;20:864-70.
30. Tingley D, Yamamoto T, Hirose K, Keele L, Imai K. Mediation: R package for causal mediation analysis. 2014.
31. Tissue plasminogen activator for acute ischemic stroke. *N. Engl. J. Med.* 1995;333:1581-7.
32. Marchildon GP, Allin S, Merkur S. Canada: Health System Review. *Health Syst Transit.* 2020;22:1-194.
33. Kamel H, Parikh NS, Chatterjee A, et al. Access to Mechanical Thrombectomy for Ischemic Stroke in the United States. *Stroke.* 2021;52:2554-61.
34. Sedgwick P. Ecological studies: advantages and disadvantages. *BMJ.* 2014;348:g2979.
35. Pampalon R, Hamel D, Gamache P. A comparison of individual and area-based socio-economic data for monitoring social inequalities in health. *Health Rep.* 2009;20:85-94.



1  
2  
3  
4  
5  
6  
7  
8  
9  
10  
11  
12  
13  
14  
15  
16  
17  
18  
19  
20  
21  
22  
23  
24  
25  
26  
27  
28  
29  
30  
31  
32  
33  
34  
35  
36  
37  
38  
39  
40  
41  
42  
43  
44  
45  
46  
47  
48  
49  
50  
51  
52  
53  
54  
55  
56  
57  
58  
59  
60

36. Pampalon R, Hamel D, Gamache P. Health inequalities, deprivation, immigration and aboriginality in Canada: a geographic perspective. *Can. J. Public Health.* 2010;101:470-4.

Confidential

1  
2  
3 **Figure Legends:**  
4

5  
6 Figure 1: Combination of material and social deprivation quintiles to create a 5-group ordinal  
7 variable. Reproduced with permission.<sup>26</sup>  
8  
9

10  
11 Figure 2: Relationship between deprivation levels and log transformed distances to the nearest  
12 CSC (Note: Distance log transformed for graphical purposes to better visualize differences)  
13  
14  
15

16  
17 Figure 3: Bar chart demonstrating the proportion of patients who had EVT attempted by  
18 deprivation level  
19  
20

21  
22 Figure 4: Logistic regression lines of best fit demonstrating the predicted proportion of patients  
23 that will receive EVT based on the distance they live from the nearest CSC, stratified by their  
24 deprivation level. (Note: Figure 4 demonstrates that, for all deprivation levels, the expected  
25 proportion of patients that will be treated with EVT decreases as the distance to the nearest  
26 CSC increases.)  
27  
28  
29  
30  
31  
32  
33  
34  
35  
36  
37  
38  
39  
40  
41  
42  
43  
44  
45  
46  
47  
48  
49  
50  
51  
52  
53  
54  
55  
56  
57  
58  
59  
60

1  
2  
3  
4  
5  
6  
7  
8  
9  
10  
11  
12  
13  
14  
15  
16  
17  
18  
19  
20  
21  
22  
23  
24  
25  
26  
27  
28  
29  
30  
31  
32  
33  
34  
35  
36  
37  
38  
39  
40  
41  
42  
43  
44  
45  
46  
47  
48  
49  
50  
51  
52  
53  
54  
55  
56  
57  
58  
59  
60

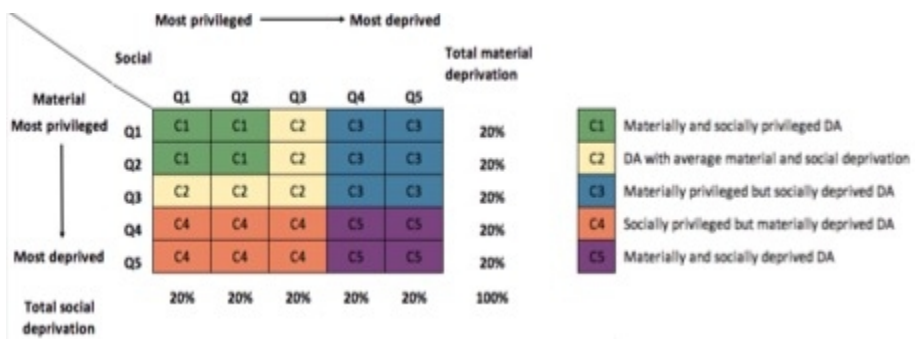

Figure 1: Combination of material and social deprivation quintiles to create a 5-group ordinal variable. Reproduced with permission.<sup>26</sup>

165x57mm (72 x 72 DPI)

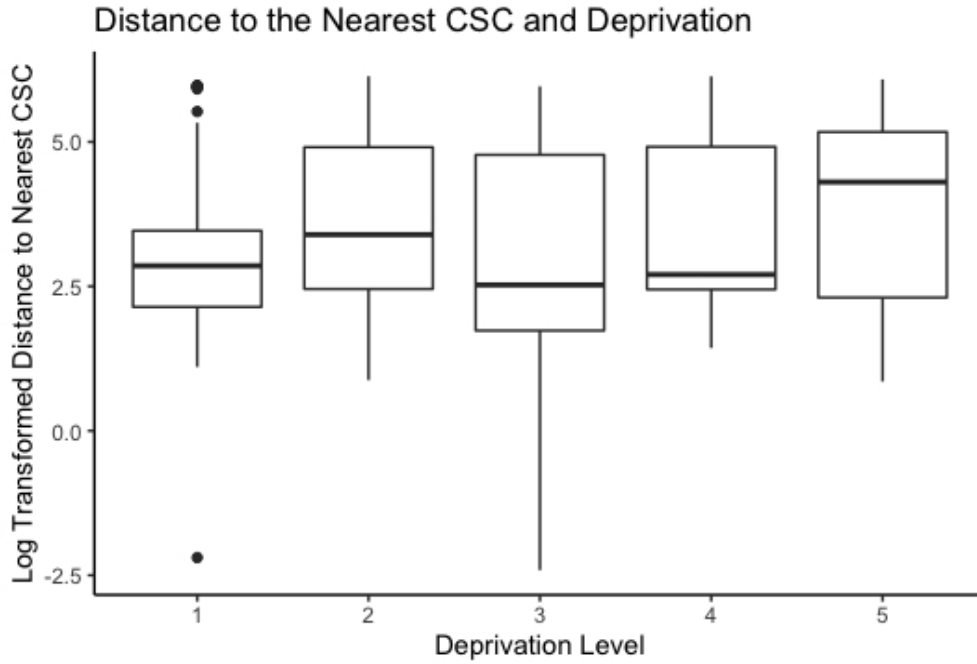

Figure 2: Relationship between deprivation levels and log transformed distances to the nearest CSC (Note: Distance log transformed for graphical purposes to better visualize differences)

189x128mm (72 x 72 DPI)

1  
2  
3  
4  
5  
6  
7  
8  
9  
10  
11  
12  
13  
14  
15  
16  
17  
18  
19  
20  
21  
22  
23  
24  
25  
26  
27  
28  
29  
30  
31  
32  
33  
34  
35  
36  
37  
38  
39  
40  
41  
42  
43  
44  
45  
46  
47  
48  
49  
50  
51  
52  
53  
54  
55  
56  
57  
58  
59  
60

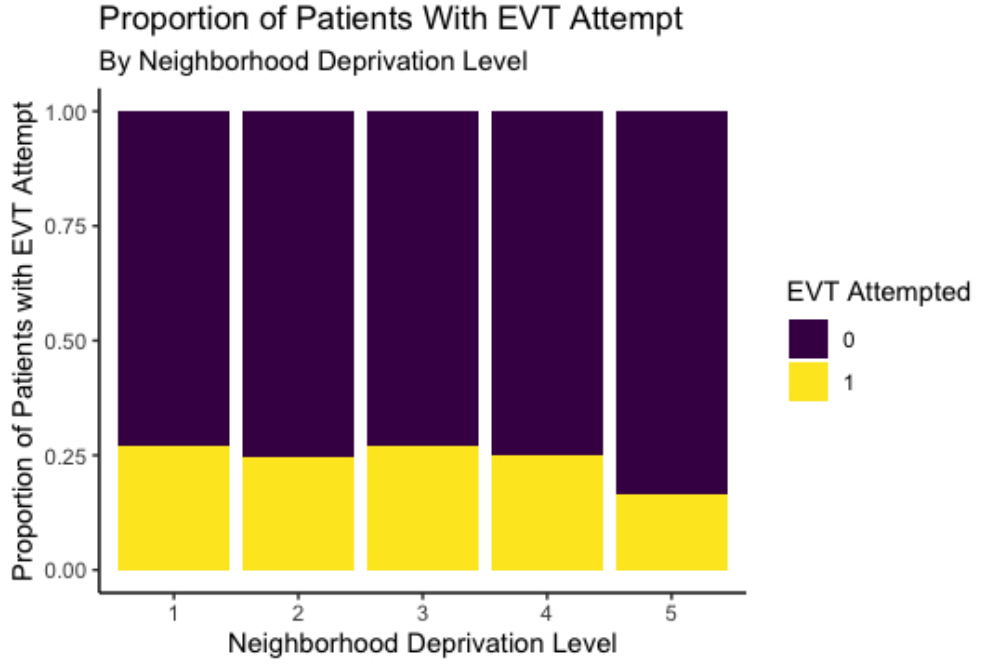

Figure 3: Bar chart demonstrating the proportion of patients who had EVT attempted by deprivation level  
189x128mm (72 x 72 DPI)

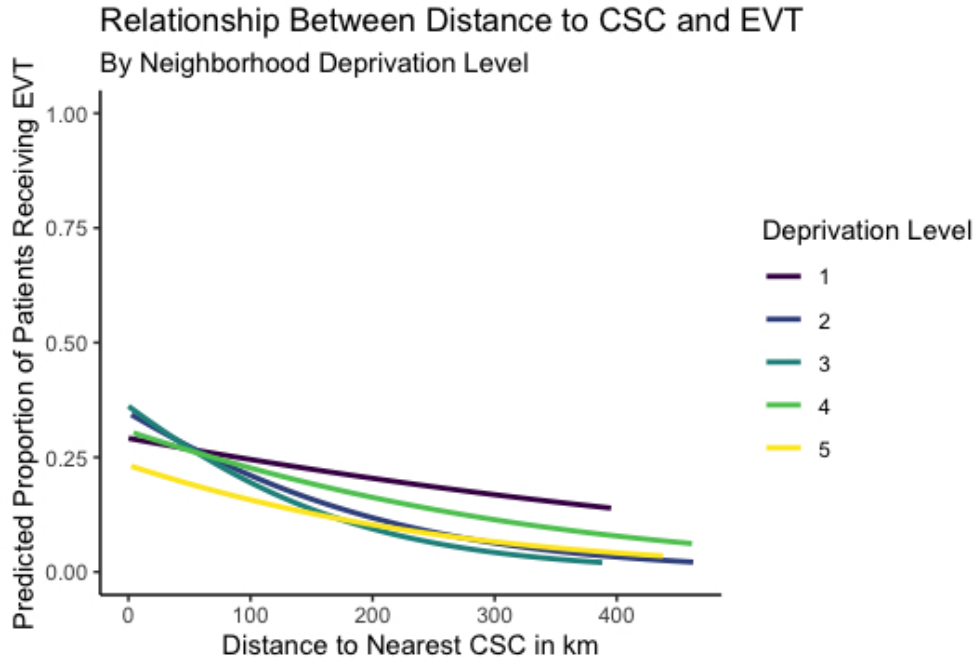

28  
29  
30  
31  
32

Figure 4: Logistic regression lines of best fit demonstrating the predicted proportion of patients that will receive EVT based on the distance they live from the nearest CSC, stratified by their deprivation level. (Note: Figure 4 demonstrates that, for all deprivation levels, the expected proportion of patients that will be treated with EVT decreases as the distance to the nearest CSC increases.)

33  
34  
35  
36  
37  
38  
39  
40  
41  
42  
43  
44  
45  
46  
47  
48  
49  
50  
51  
52  
53  
54  
55  
56  
57  
58  
59  
60

189x128mm (72 x 72 DPI)

Table 1: Baseline and Clinical Characteristics of the Study Cohort

|                                                                                 | Total (n = 1335)                                                                         | EVT <sup>b</sup> Attempted<br>(n = 314)                                                | No EVT <sup>b</sup><br>Attempted (n =<br>1021)                                              | p-value |
|---------------------------------------------------------------------------------|------------------------------------------------------------------------------------------|----------------------------------------------------------------------------------------|---------------------------------------------------------------------------------------------|---------|
| Age (median,<br>IQR <sup>c</sup> )                                              | 72 (21)                                                                                  | 71 (18)                                                                                | 73 (22)                                                                                     | < 0.001 |
| Male Sex                                                                        | 731 (54.8%)                                                                              | 175 (55.7%)                                                                            | 556 (54.4%)                                                                                 | 0.740   |
| Pre-Alteplase<br>NIHSS Grade<br>(median, IQR <sup>c</sup> )                     | 9 (11)                                                                                   | 17.5 (8)                                                                               | 8 (7)                                                                                       | < 0.001 |
| Distance to<br>Nearest CSC <sup>a</sup> in<br>km (median,<br>IQR <sup>c</sup> ) | 22.5 (128)                                                                               | 13.6 (43.5)                                                                            | 29.8 (163)                                                                                  | < 0.001 |
| Deprivation<br>Grouping <sup>*+</sup>                                           | 1 - 157 (11.8%)<br>2- 251 (18.8%)<br>3 - 308 (23.1%)<br>4- 220 (16.5%)<br>5- 247 (18.5%) | 1 - 42 (13.4%)<br>2 - 62 (19.7%)<br>3 - 81 (25.8%)<br>4 - 55 (17.5%)<br>5 - 40 (12.7%) | 1 - 115 (11.3%)<br>2 - 189 (18.5%)<br>3 - 227 (22.2%)<br>4 - 165 (16.2%)<br>5 - 207 (20.3%) | 0.040   |

\* Missing 152 patients

+ Level 1 is least deprived grouping

<sup>a</sup> Comprehensive Stroke Centre

<sup>b</sup> Endovascular Thrombectomy

<sup>c</sup> Interquartile Range

Table 2: Unadjusted Odds Ratios (95% CI, *p*-value) Deprivation Levels and EVT using complete data

| Deprivation Level | OR* <sup>b</sup> (95% CI <sup>a</sup> ) | <i>p</i> -value |
|-------------------|-----------------------------------------|-----------------|
| 1                 | Reference Level                         | N/A             |
| 2                 | 0.89 (0.56 – 1.41)                      | 0.618           |
| 3                 | 1.00 (0.65 – 1.56)                      | 0.986           |
| 4                 | 0.90 (0.56 – 1.43)                      | 0.677           |
| 5                 | 0.53 (0.32 – 0.87)                      | <b>0.011</b>    |

\* Odds Ratios calculated in comparison to the least deprived deprivation level

<sup>a</sup> Confidence Interval

<sup>b</sup> Odds Ratio

Confidential



Table 3: Adjusted Odds Ratios (95% CI, *p*-value) Deprivation Levels and EVT without distance as a covariate using complete data

| Variable                  | OR* <sup>c</sup> (95% CI <sup>a</sup> ) | <i>p</i> -value   |
|---------------------------|-----------------------------------------|-------------------|
| Deprivation Level 1       | Reference Level                         | N/A               |
| Deprivation Level 2       | 0.889 (0.521 – 1.527)                   | 0.669             |
| Deprivation Level 3       | 0.963 (0.577 – 1.622)                   | 0.885             |
| Deprivation Level 4       | 0.749 (0.428 – 1.315)                   | 0.313             |
| Deprivation Level 5       | 0.431 (0.240 – 0.769)                   | <b>0.005</b>      |
| Age                       | 0.981 (0.970 – 0.992)                   | <b>&lt; 0.001</b> |
| Male Sex                  | 1.030 (0.746 – 1.425)                   | 0.856             |
| Pre-Alteplase NIHSS Grade | 1.201 (1.173 – 1.232)                   | <b>&lt; 0.001</b> |

\* Odds Ratios calculated in comparison to the least deprived deprivation level

<sup>a</sup> Confidence Interval

<sup>b</sup> Comprehensive Stroke Centre

<sup>c</sup> National Institute of Health Stroke Scale

<sup>d</sup> Odds Ratio

Table 4: Adjusted Odds Ratios (95% CI, *p*-value) Deprivation Levels and EVT using complete data

| Variable                                   | OR* <sup>c</sup> (95% CI <sup>a</sup> ) | <i>p</i> -value   |
|--------------------------------------------|-----------------------------------------|-------------------|
| Deprivation Level 1                        | Reference Level                         | N/A               |
| Deprivation Level 2                        | 1.072 (0.615 – 1.880)                   | 0.809             |
| Deprivation Level 3                        | 1.015 (0.597 – 1.742)                   | 0.957             |
| Deprivation Level 4                        | 0.861 (0.482 – 1.543)                   | 0.614             |
| Deprivation Level 5                        | 0.604 (0.330 – 1.103)                   | 0.101             |
| Age                                        | 0.976 (0.965 – 0.988)                   | <b>&lt; 0.001</b> |
| Male Sex                                   | 0.989 (0.707 – 1.385)                   | 0.948             |
| Pre-Alteplase NIHSS Grade                  | 1.219 (1.188 – 1.252)                   | <b>&lt;0.001</b>  |
| Distance to Nearest CSC <sup>b</sup> in km | 0.992 (0.990 – 0.994)                   | <b>&lt;0.001</b>  |

\* Odds Ratios calculated in comparison to the least deprived deprivation level

<sup>a</sup> Confidence Interval

<sup>b</sup> Comprehensive Stroke Centre

<sup>c</sup> National Institute of Health Stroke Scale

<sup>d</sup> Odds Ratio
